# Supplementary material
Source: PubMed Central journal article supplement (PMC2640456)
Supplement: NIHMS31101-supplement-02.pdf [file NIHMS31101-supplement-02.pdf]

### Supplementary Table S2-BCC Transcripts

| Entrez GeneID | Gene Symbol | Gene Description                                                                                  | fold change |
|---------------|-------------|---------------------------------------------------------------------------------------------------|-------------|
| 21333         | Tac1        | Tachykinin 1                                                                                      | 13.8        |
| 13175         | Dcamk1      | Doublecortin and calcium/calmodulin-dependent protein kinase-like 1                               | 6.53        |
| 68730         | Dus1l       | Dihydrouridine synthase 1-like ( <i>S. cerevisiae</i> )                                           | 5.88        |
| 16451         | Jak1        | Janus kinase 1                                                                                    | 4.12        |
| 215351        | Senp6       | SUMO/sentrin specific peptidase 6                                                                 | 3.82        |
| 216618        | Ccdc104     | Coiled-coil domain containing 104                                                                 | 3.53        |
| 13205         | Ddx3x       | DEAD/H (Asp-Glu-Ala-Asp/His) box polypeptide 3, X-linked                                          | 3.49        |
| 15251         | Hif1a       | Hypoxia inducible factor 1, alpha subunit                                                         | 3.26        |
| 51810         | Hnrpu       | Heterogeneous nuclear ribonucleoprotein U                                                         | 3.16        |
| 21808         | Tgfb2       | Transforming growth factor, beta 2                                                                | 3.13        |
| 12916         | Crem        | CAMP responsive element modulator                                                                 | 3.09        |
| 101490        | Inpp5f      | Inositol polyphosphate-5-phosphatase F                                                            | 3.05        |
| 66912         | Bzw2        | Basic leucine zipper and W2 domains 2                                                             | 3.02        |
| 11938         | Atp2a2      | ATPase, Ca <sup>++</sup> transporting, cardiac muscle, slow twitch 2                              | 3.01        |
| 16573         | Kif5b       | Kinesin family member 5B                                                                          | 3           |
| 52502         | Carhsp1     | Calcium regulated heat stable protein 1                                                           | 2.99        |
| 72289         | Malat1      | Metastasis associated lung adenocarcinoma transcript 1 (non-coding RNA)                           | 2.98        |
| 17112         | Tm4sf1      | Transmembrane 4 superfamily member 1                                                              | 2.96        |
| 26950         | Vsnl1       | Visinin-like 1                                                                                    | 2.94        |
| 18619         | Enk         | Enk                                                                                               | 2.94        |
| 170719        | Oxr1        | Oxidation resistance 1                                                                            | 2.94        |
| 15519         | Hsp90aa1    | Heat shock protein 90kDa alpha (cytosolic), class A member 1                                      | 2.88        |
| 218952        | Plekhc1     | Pleckstrin homology domain containing, family C (with FERM domain) member 1                       | 2.88        |
| 93762         | Smarca5     | SWI/SNF related, matrix associated, actin dependent regulator of chromatin, subfamily a, member 5 | 2.85        |

|        |          |                                                                                          |      |
|--------|----------|------------------------------------------------------------------------------------------|------|
| 19983  | Rpl5     | Ribosomal protein L5                                                                     | 2.82 |
| 18148  | Npm1     | Nucleophosmin 1                                                                          | 2.78 |
| 53379  | Hnrpa2b1 | Heterogeneous nuclear ribonucleoprotein A2/B1                                            | 2.77 |
| 215449 | Rap1b    | RAS related protein 1b                                                                   | 2.77 |
| 319448 | Fndc3a   | Fibronectin type III domain containing 3a                                                | 2.75 |
| 13684  | Eif4e    | Eukaryotic translation initiation factor 4E                                              | 2.75 |
| 20254  | Scg2     | Secretogranin II                                                                         | 2.74 |
| 13690  | Eif4g2   | Eukaryotic translation initiation factor 4, gamma 2                                      | 2.74 |
| 19346  | Rab6     | RAB6, member RAS oncogene family                                                         | 2.73 |
| 15481  | Hspa8    | Heat shock protein 8                                                                     | 2.73 |
| 71799  | Ptcd1    | Pentatricopeptide repeat domain 1                                                        | 2.71 |
| 76299  | Txndc4   | Thioredoxin domain containing 4 (endoplasmic reticulum)                                  | 2.7  |
| 380684 | Nefh     | Neurofilament, heavy polypeptide                                                         | 2.67 |
| 67154  | Mtdh     | Metadherin                                                                               | 2.67 |
| 74117  | Actr3    | ARP3 actin-related protein 3 homolog (yeast)                                             | 2.66 |
| 22027  | Hsp90b1  | Heat shock protein 90kDa beta (Grp94), member 1                                          | 2.66 |
| 217869 | Eif5     | Eukaryotic translation initiation factor 5                                               | 2.61 |
| 56397  | Morf4l2  | Mortality factor 4 like 2                                                                | 2.6  |
| 12653  | Chgb     | Chromogranin B                                                                           | 2.59 |
| 16412  | Itgb1    | Integrin beta 1 (fibronectin receptor beta)                                              | 2.59 |
| 57377  | Gcs1     | Glucosidase 1                                                                            | 2.59 |
| 67437  | Ssr3     | Signal sequence receptor, gamma                                                          | 2.57 |
| 56258  | Hnrph2   | Heterogeneous nuclear ribonucleoprotein H2                                               | 2.57 |
| 71514  | Sfpq     | Splicing factor proline/glutamine rich (polypyrimidine tract binding protein associated) | 2.56 |
| 19244  | Ptp4a2   | Protein tyrosine phosphatase 4a2                                                         | 2.55 |
| 17149  | Magoh    | Mago-nashi homolog, proliferation-associated (Drosophila)                                | 2.55 |

|        |            |                                                                   |      |
|--------|------------|-------------------------------------------------------------------|------|
| 12313  | Calm1      | Calmodulin 1                                                      | 2.54 |
| 52666  | D10Ert610e | DNA segment, Chr 10, ERATO Doi 610, expressed                     | 2.53 |
| 20102  | Rps4x      | Ribosomal protein S4, X-linked                                    | 2.53 |
| 75423  | Arl5a      | ADP-ribosylation factor-like 5A                                   | 2.53 |
| 110960 | Tars       | Threonyl-tRNA synthetase                                          | 2.51 |
| 212712 | Satb2      | Special AT-rich sequence binding protein 2                        | 2.5  |
| 20005  | Rpl9       | Ribosomal protein L9                                              | 2.5  |
| 13681  | Eif4a1     | Eukaryotic translation initiation factor 4A1                      | 2.49 |
| 18458  | Pabpc1     | Poly A binding protein, cytoplasmic 1                             | 2.49 |
| 50771  | Atp9b      | ATPas, class II, type 9B                                          | 2.49 |
| 50933  | Uchl3      | Ubiquitin carboxyl-terminal esterase L3 (ubiquitin thiolesterase) | 2.47 |
| 71994  | Cnn3       | Calponin 3, acidic                                                | 2.47 |
| 67529  | Fgfr1op2   | FGFR1 oncogene partner 2                                          | 2.46 |
| 330938 | Dixdc1     | DIX domain containing 1                                           | 2.46 |
| 326618 | Tpm4       | Tropomyosin 4                                                     | 2.45 |
| 12469  | Cct8       | Chaperonin subunit 8 (theta)                                      | 2.44 |
| 21761  | Morf4l1    | Mortality factor 4 like 1                                         | 2.44 |
| 76709  | Arpc2      | Actin related protein 2/3 complex, subunit 2                      | 2.44 |
| 15289  | Hmgb1      | High mobility group box 1                                         | 2.42 |
| 21873  | Tjp2       | Tight junction protein 2                                          | 2.42 |
| 50926  | Hnrpd1     | Heterogeneous nuclear ribonucleoprotein D-like                    | 2.42 |
| 226757 | Wdr26      | WD repeat domain 26                                               | 2.41 |
| 53324  | Narp       | Narp                                                              | 2.41 |
| 54375  | Azin1      | Antizyme inhibitor 1                                              | 2.41 |
| 226982 | Eif5b      | Eukaryotic translation initiation factor 5B                       | 2.38 |
| 66882  | Bzw1       | Basic leucine zipper and W2 domains 1                             | 2.38 |

|        |          |                                                                |      |
|--------|----------|----------------------------------------------------------------|------|
| 56543  | Kcnd3    | Potassium voltage-gated channel, Shal-related family, member 3 | 2.38 |
| 13207  | Ddx5     | DEAD (Asp-Glu-Ala-Asp) box polypeptide 5                       | 2.37 |
| 67160  | Eef1g    | Eukaryotic translation elongation factor 1 gamma               | 2.37 |
| 20848  | Stat3    | Signal transducer and activator of transcription 3             | 2.36 |
| 107508 | Eprs     | Glutamyl-prolyl-tRNA synthetase                                | 2.36 |
| 66645  | Pspc1    | Paraspeckle protein 1                                          | 2.34 |
| 11843  | Arf4     | ADP-ribosylation factor 4                                      | 2.33 |
| 74838  | Narg1    | NMDA receptor-regulated gene 1                                 | 2.33 |
| 12314  | Calm2    | Calmodulin 2                                                   | 2.32 |
| 67891  | Rpl4     | Ribosomal protein L4                                           | 2.31 |
| 15502  | Dnaja1   | DnaJ (Hsp40) homolog, subfamily A, member 1                    | 2.31 |
| 22712  | Zfp54    | Zinc finger protein 54                                         | 2.31 |
| 59069  | Tpm3     | Tropomyosin 3, gamma                                           | 2.3  |
| 16211  | Kpnb1    | Karyopherin (importin) beta 1                                  | 2.28 |
| 13627  | Eef1a1   | Eukaryotic translation elongation factor 1 alpha 1             | 2.28 |
| 15382  | Hnrpa1   | Heterogeneous nuclear ribonucleoprotein A1                     | 2.28 |
| 57874  | Ptlad1   | Protein tyrosine phosphatase-like A domain containing 1        | 2.28 |
| 19877  | Rock1    | Rho-associated coiled-coil containing protein kinase 1         | 2.27 |
| 14827  | Pdia3    | Protein disulfide isomerase associated 3                       | 2.27 |
| 14852  | Gspt1    | G1 to S phase transition 1                                     | 2.27 |
| 13669  | Eif3s10  | Eukaryotic translation initiation factor 3, subunit 10 (theta) | 2.26 |
| 18139  | Zfml     | Zinc finger, matrin-like                                       | 2.26 |
| 69276  | Tloc1    | Translocation protein 1                                        | 2.26 |
| 67302  | Zc3h13   | Zinc finger CCCH type containing 13                            | 2.25 |
| 640703 | EG640703 | Predicted gene, EG640703                                       | 2.24 |
| 12461  | Cct2     | Chaperonin subunit 2 (beta)                                    | 2.24 |

|        |           |                                                              |      |
|--------|-----------|--------------------------------------------------------------|------|
| 66870  | Serbp1    | Serpine1 mRNA binding protein 1                              | 2.23 |
| 76295  | Atp11b    | ATPase, Class VI, type 11B                                   | 2.22 |
| 78257  | Lrrc9     | Leucine rich repeat containing 9                             | 2.22 |
| 15526  | Hspa9a    | Heat shock protein 9A                                        | 2.22 |
| 68240  | Rpa3      | Replication protein A3                                       | 2.22 |
| 56354  | Dnajc7    | DnaJ (Hsp40) homolog, subfamily C, member 7                  | 2.21 |
| 19046  | Ppp1cb    | Protein phosphatase 1, catalytic subunit, beta isoform       | 2.21 |
| 13665  | Eif2s1    | Eukaryotic translation initiation factor 2, subunit 1 alpha  | 2.2  |
| 667666 | LOC667666 | Similar to reduced expression 2                              | 2.19 |
| 26900  | Ddx3y     | DEAD (Asp-Glu-Ala-Asp) box polypeptide 3, Y-linked           | 2.19 |
| 66105  | Ube2d3    | Ubiquitin-conjugating enzyme E2D 3 (UBC4/5 homolog, yeast)   | 2.19 |
| 19921  | Rpl19     | Ribosomal protein L19                                        | 2.18 |
| 108989 | Tpr       | Translocated promoter region                                 | 2.18 |
| 353172 | Gars      | Glycyl-tRNA synthetase                                       | 2.18 |
| 56445  | Dnaja2    | DnaJ (Hsp40) homolog, subfamily A, member 2                  | 2.18 |
| 20384  | Sfrs5     | Splicing factor, arginine/serine-rich 5 (SRp40, HRS)         | 2.18 |
| 81898  | Sf3b1     | Splicing factor 3b, subunit 1                                | 2.18 |
| 75302  | Asx2      | Additional sex combs like 2 (Drosophila)                     | 2.18 |
| 66244  | Sdccag1   | Serologically defined colon cancer antigen 1                 | 2.17 |
| 66335  | Atp6v1c1  | ATPase, H <sup>+</sup> transporting, lysosomal V1 subunit C1 | 2.17 |
| 232087 | Mat2a     | Methionine adenosyltransferase II, alpha                     | 2.17 |
| 19652  | Rbm3      | RNA binding motif protein 3                                  | 2.17 |
| 28030  | Gfm1      | G elongation factor, mitochondrial 1                         | 2.16 |
| 56403  | Syncrip   | Synaptotagmin binding, cytoplasmic RNA interacting protein   | 2.16 |
| 19896  | Rpl10a    | Ribosomal protein L10A                                       | 2.16 |
| 66177  | Ubl5      | Ubiquitin-like 5                                             | 2.15 |

|        |           |                                                                        |      |
|--------|-----------|------------------------------------------------------------------------|------|
| 216739 | Acsl6     | Acyl-CoA synthetase long-chain family member 6                         | 2.15 |
| 276770 | Eif5a     | Eukaryotic translation initiation factor 5A                            | 2.14 |
| 67869  | Paip2     | Polyadenylate-binding protein-interacting protein 2                    | 2.14 |
| 22134  | Tgoln1    | Trans-golgi network protein                                            | 2.14 |
| 18738  | Pitpna    | Phosphatidylinositol transfer protein, alpha                           | 2.13 |
| 17975  | Ncl       | Nucleolin                                                              | 2.13 |
| 14618  | Gjb1      | Gap junction membrane channel protein beta 1                           | 2.12 |
| 26413  | Mapk1     | Mitogen activated protein kinase 1                                     | 2.12 |
| 20191  | Ryr2      | Ryanodine receptor 2, cardiac                                          | 2.12 |
| 22589  | Atrx      | Alpha thalassemia/mental retardation syndrome X-linked homolog (human) | 2.12 |
| 59027  | Pbef1     | Pre-B-cell colony-enhancing factor 1                                   | 2.11 |
| 12038  | Bche      | Butyrylcholinesterase                                                  | 2.11 |
| 239528 | Eif2c2    | Eukaryotic translation initiation factor 2C, 2                         | 2.1  |
| 381199 | Tmem151   | Transmembrane protein 151                                              | 2.09 |
| 26554  | Cul3      | Cullin 3                                                               | 2.09 |
| 170763 | Zfp87     | Zinc finger protein 87                                                 | 2.09 |
| 224902 | Safb2     | Scaffold attachment factor B2                                          | 2.09 |
| 17463  | Psmc7     | Proteasome (prosome, macropain) 26S subunit, non-ATPase, 7             | 2.09 |
| 11787  | Apbb2     | Amyloid beta (A4) precursor protein-binding, family B, member 2        | 2.08 |
| 76815  | Ndp52     | Nuclear domain 10 protein 52                                           | 2.08 |
| 12306  | Anxa2     | Annexin A2                                                             | 2.08 |
| 69020  | Zfp707    | Zinc finger protein 707                                                | 2.08 |
| 67533  | Ppifbp1   | PTPRF interacting protein, binding protein 1 (liprin beta 1)           | 2.08 |
| 117198 | Ivns1abp  | Influenza virus NS1A binding protein                                   | 2.08 |
| 666841 | LOC666841 | Hypothetical protein LOC666841                                         | 2.08 |
| 19330  | Rab18     | RAB18, member RAS oncogene family                                      | 2.07 |

|        |         |                                                                                          |      |
|--------|---------|------------------------------------------------------------------------------------------|------|
| 54214  | Golga4  | Golgi autoantigen, golgin subfamily a, 4                                                 | 2.06 |
| 73274  | Gpbp1   | GC-rich promoter binding protein 1                                                       | 2.06 |
| 22413  | Wnt2    | Wingless-related MMTV integration site 2                                                 | 2.06 |
| 24109  | Ubl3    | Ubiquitin-like 3                                                                         | 2.06 |
| 240753 | Plekha6 | Pleckstrin homology domain containing, family A member 6                                 | 2.05 |
| 19876  | Robo1   | Roundabout homolog 1 (Drosophila)                                                        | 2.05 |
| 269593 | Luzp1   | Leucine zipper protein 1                                                                 | 2.04 |
| 19656  | Rbmxrt  | RNA binding motif protein, X chromosome retrogene                                        | 2.04 |
| 22631  | Ywhaz   | Tyrosine 3-monooxygenase/tryptophan 5-monooxygenase activation protein, zeta polypeptide | 2.04 |
| 65960  | Twsg1   | Twisted gastrulation homolog 1 (Drosophila)                                              | 2.04 |
| 22004  | Tpm2    | Tropomyosin 2, beta                                                                      | 2.04 |
| 226757 | Wdr26   | WD repeat domain 26                                                                      | 2.03 |
| 12724  | Clcn2   | Chloride channel 2                                                                       | 2.03 |
| 229663 | Csde1   | Cold shock domain containing E1, RNA binding                                             | 2.03 |
| 71912  | Jsrp1   | Junctional sarcoplasmic reticulum protein 1                                              | 2.02 |
| 18412  | Sqstm1  | Sequestosome 1                                                                           | 2.02 |
| 54633  | Pqbp1   | Polyglutamine binding protein 1                                                          | 2.02 |
| 12818  | Col14a1 | Procollagen, type XIV, alpha 1                                                           | 2.02 |
| 22003  | Tpm1    | Tropomyosin 1, alpha                                                                     | 2.01 |
| 70356  | St13    | Suppression of tumorigenicity 13                                                         | 2.01 |
| 66661  | Srp72   | Signal recognition particle 72                                                           | 2.01 |
| 17755  | Mtap1b  | Microtubule-associated protein 1 B                                                       | 2.01 |
| 19317  | Qk      | Quaking                                                                                  | 2.01 |
| 22223  | Uchl1   | Ubiquitin carboxy-terminal hydrolase L1                                                  | 2.01 |
| 319939 | Tns3    | Tensin 3                                                                                 | 2.01 |
| 78134  | Gpr23   | G protein-coupled receptor 23                                                            | 2.01 |

|        |        |                                                       |      |
|--------|--------|-------------------------------------------------------|------|
| 21857  | Timp1  | Tissue inhibitor of metalloproteinase 1               | 2.01 |
| 20226  | Sars   | Seryl-aminoacyl-tRNA synthetase                       | 2.01 |
| 56347  | Eif3s8 | Eukaryotic translation initiation factor 3, subunit 8 | 2    |
| 101861 | Ints4  | Integrator complex subunit 4                          | 2    |
| 24128  | Xrn2   | 5'-3' exoribonuclease 2                               | 2    |
| 56307  | Metap2 | Methionine aminopeptidase 2                           | 1.99 |
| 12798  | Cnn2   | Calponin 2                                            | 1.99 |
