# Supplementary material
Source: PubMed Central journal article supplement (PMC2640456)
Supplement: NIHMS31101-supplement-06.pdf [file NIHMS31101-supplement-06.pdf]

Figure 1b BCC

BCC

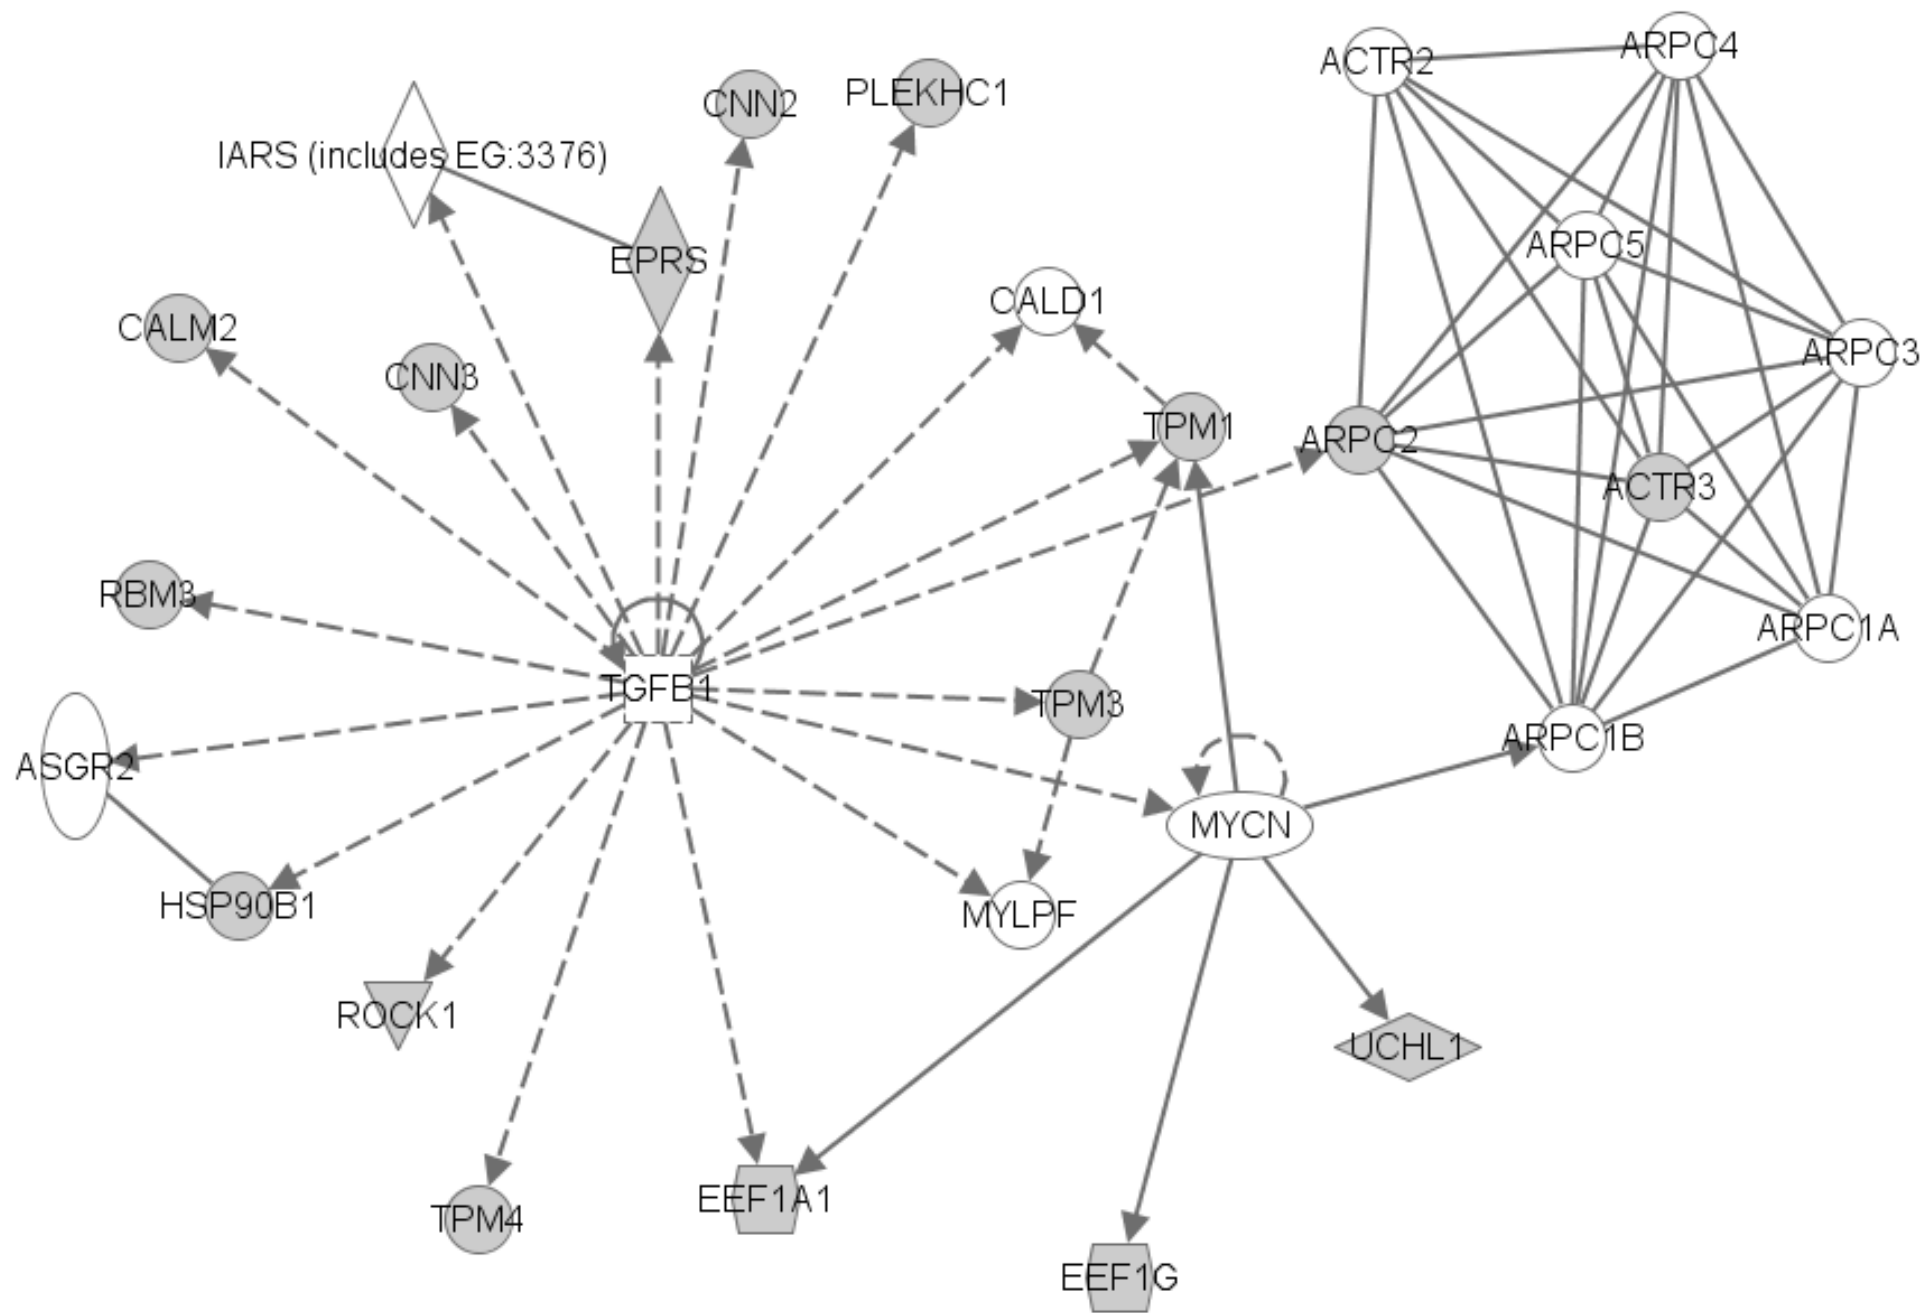

© 2000-2007 Ingenuity Systems, Inc. All rights reserved.

Figure 1c BCC

BCC

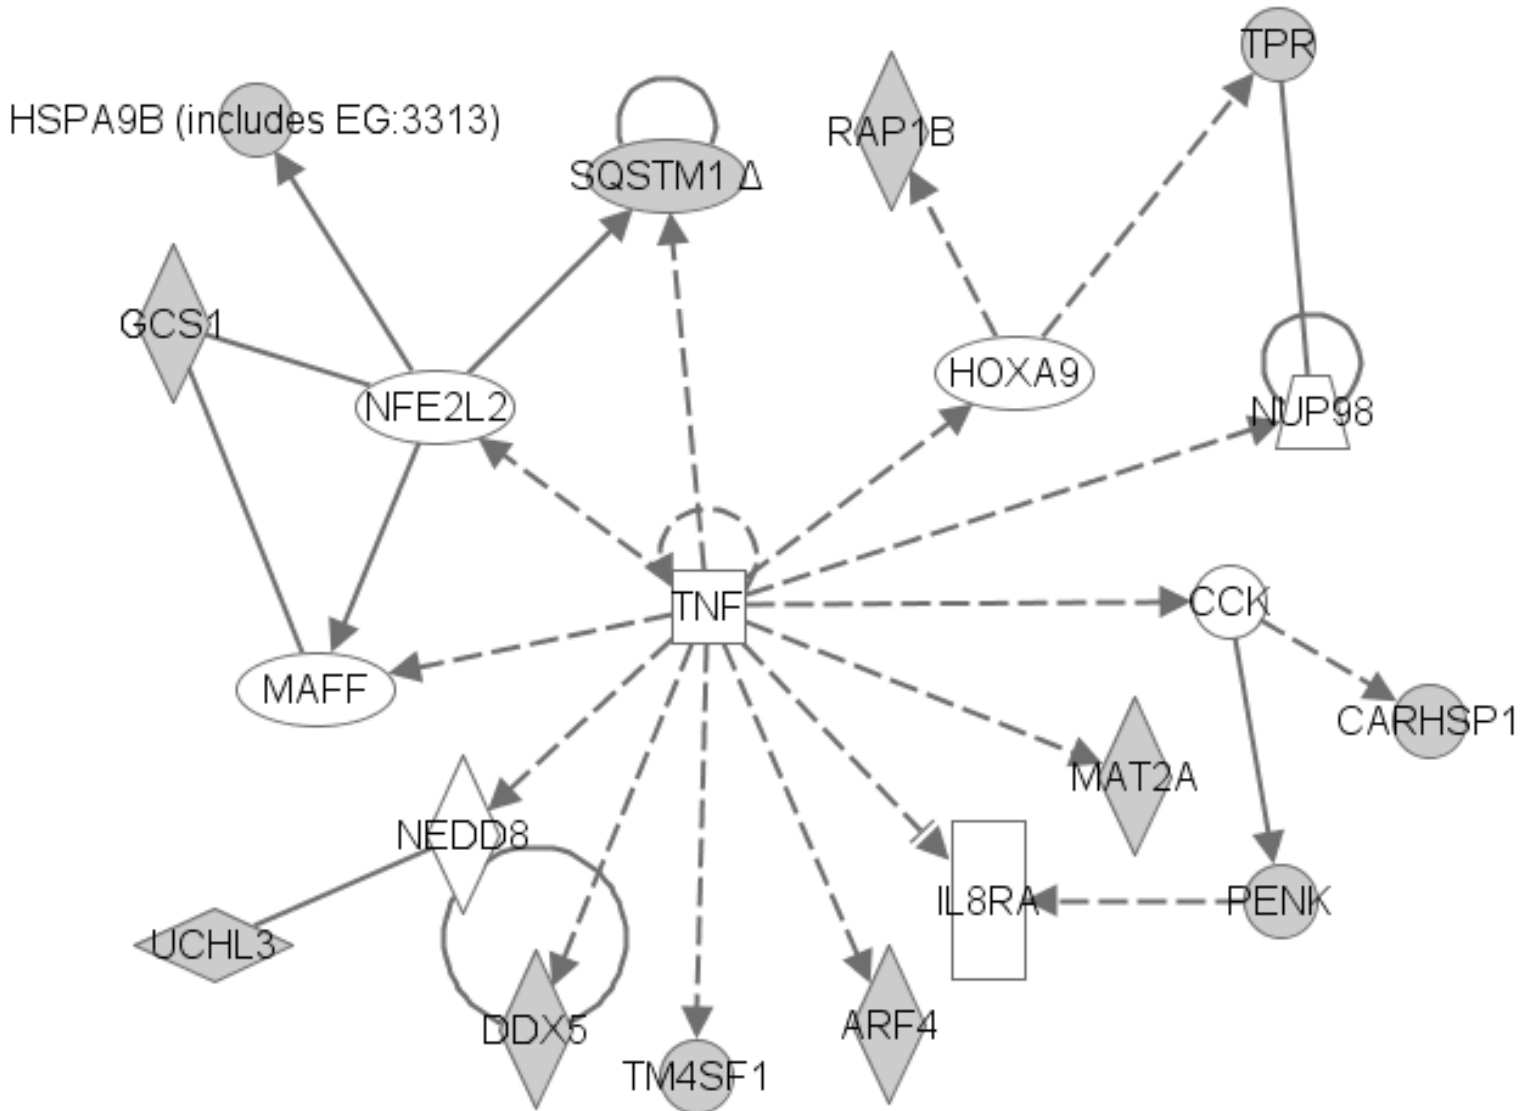

© 2000-2007 Ingenuity Systems, Inc. All rights reserved.

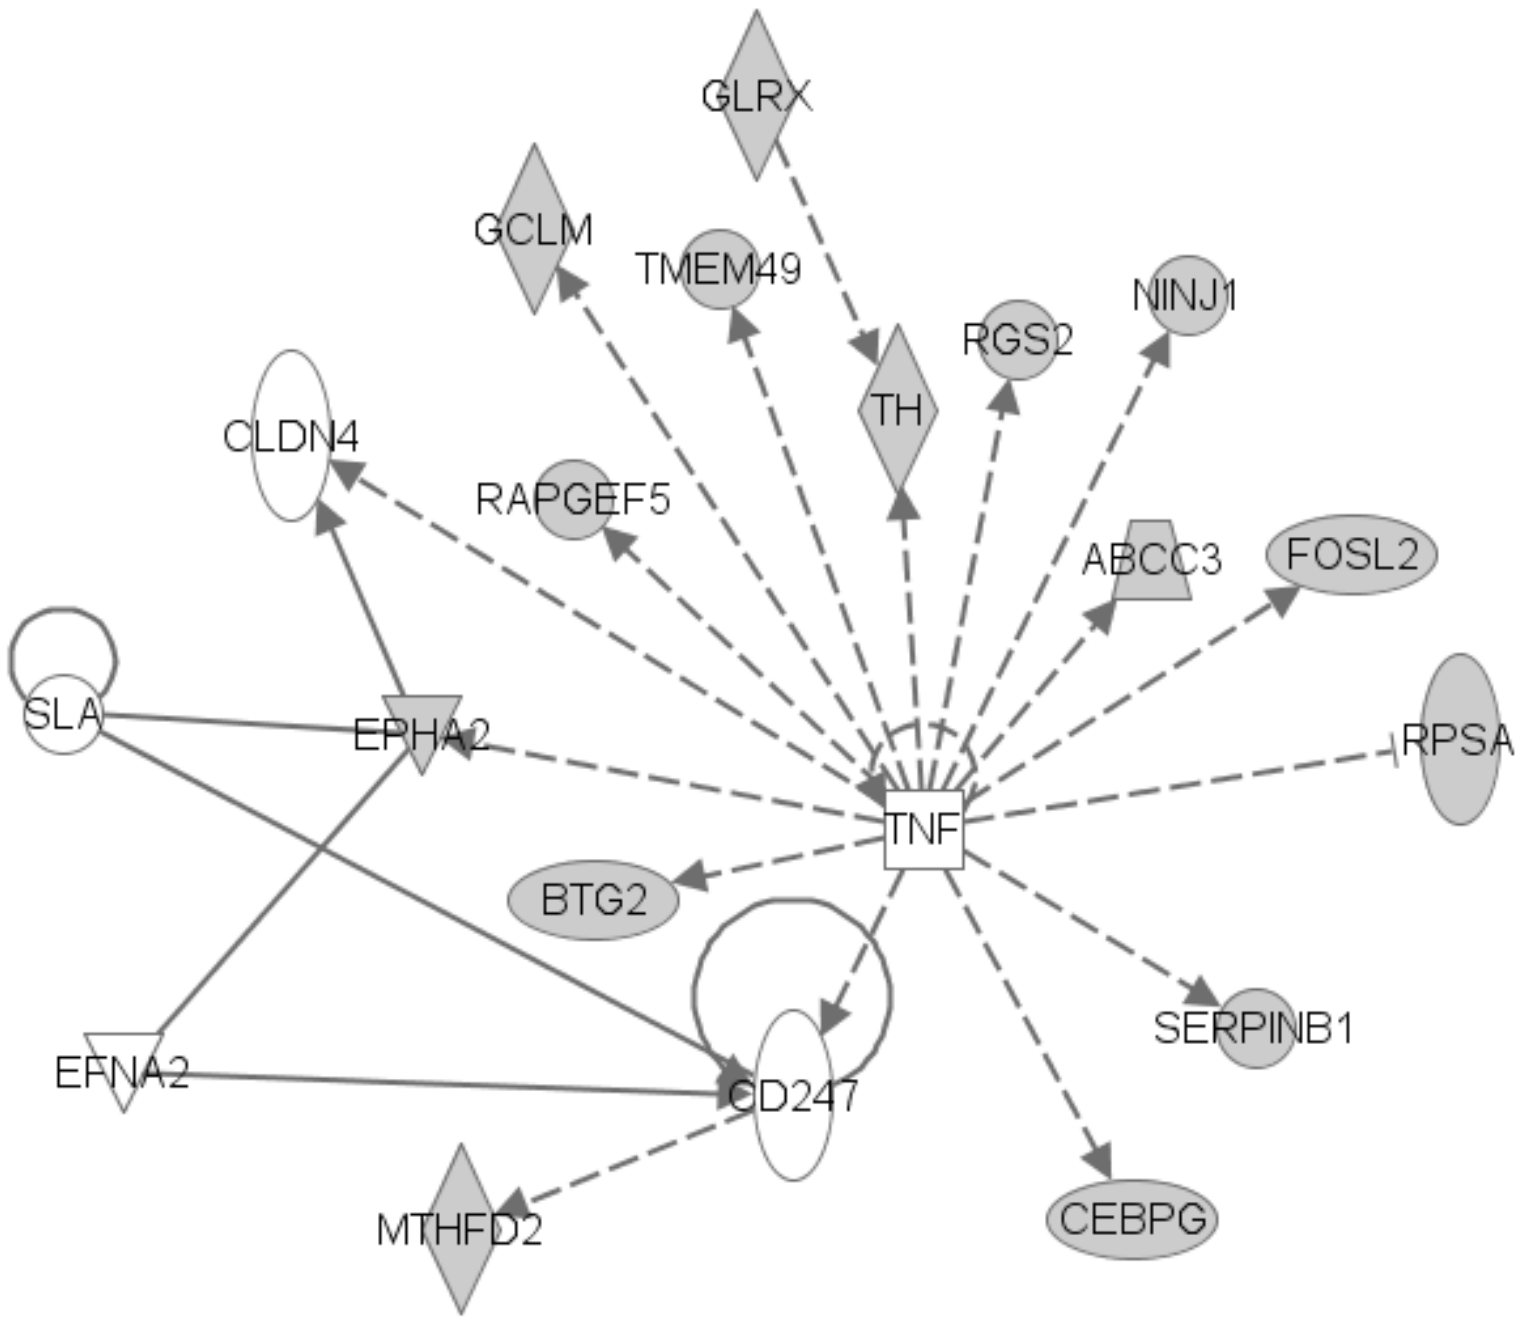

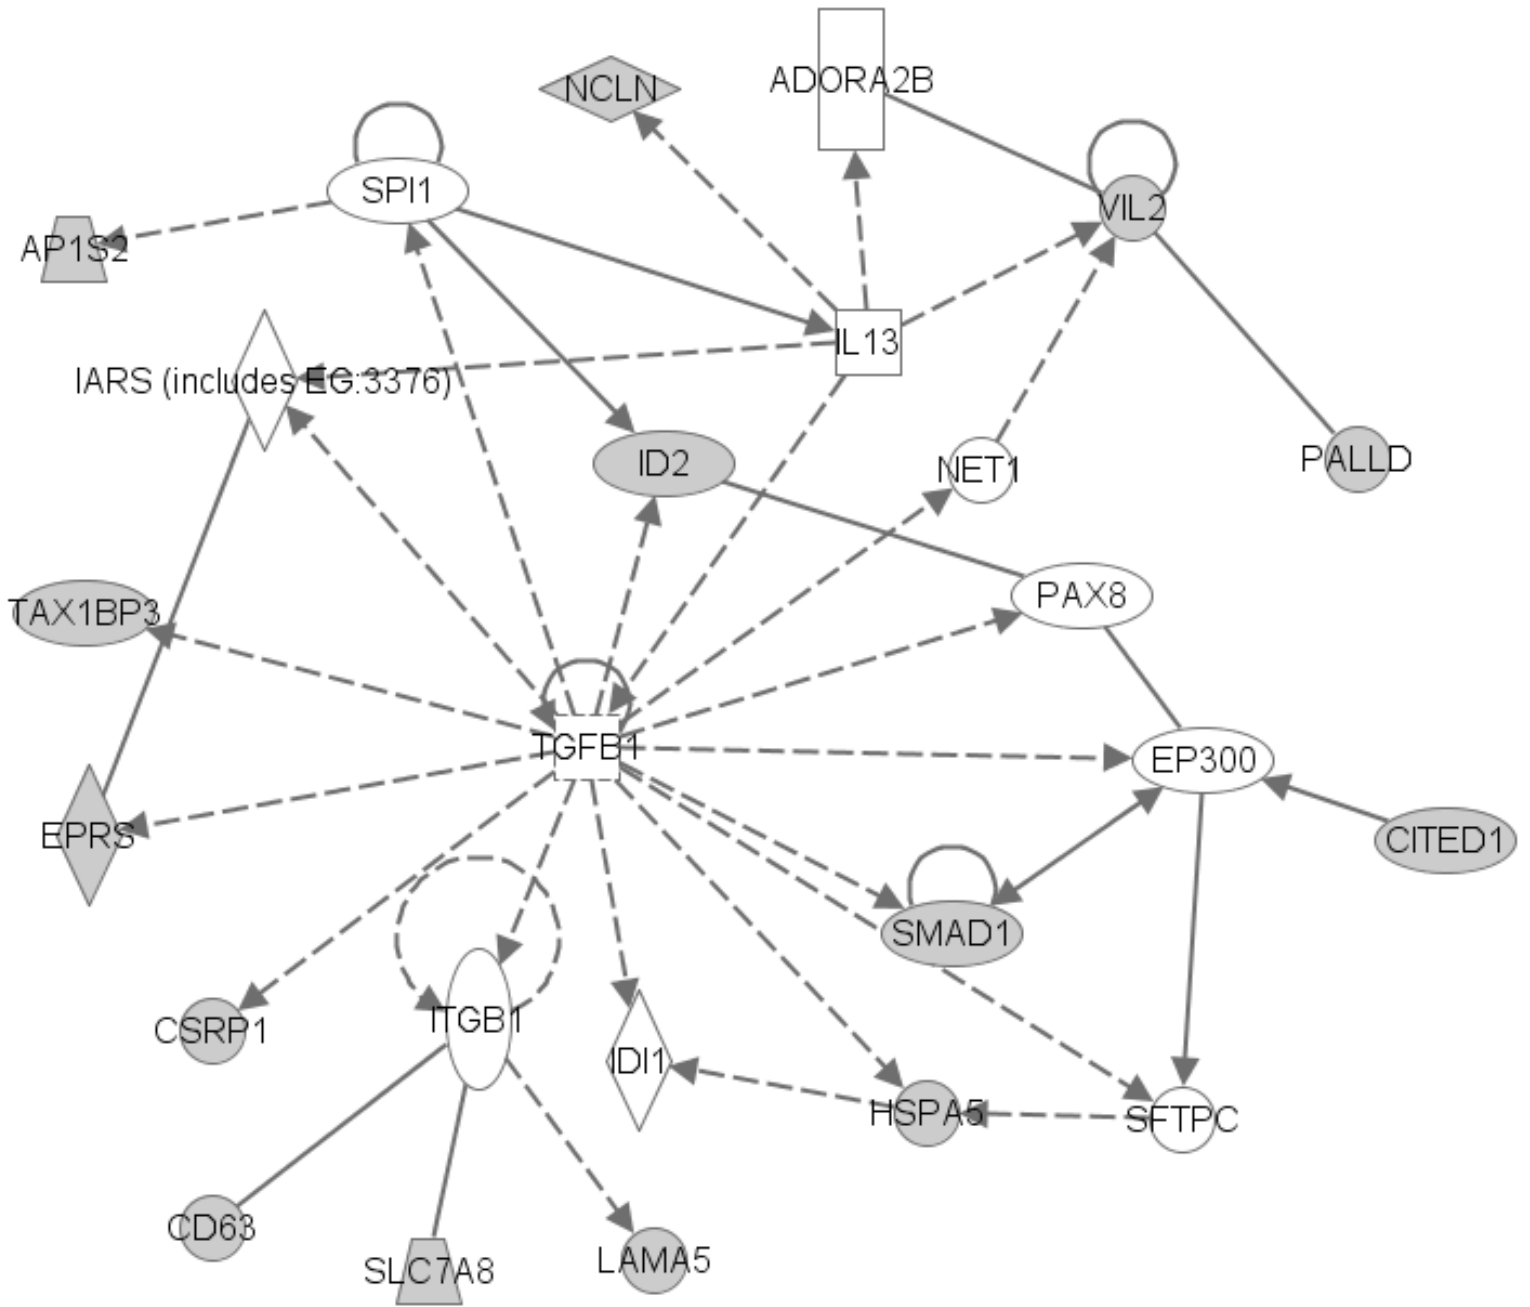

© 2000-2007 Ingenuity Systems, Inc. All rights reserved.

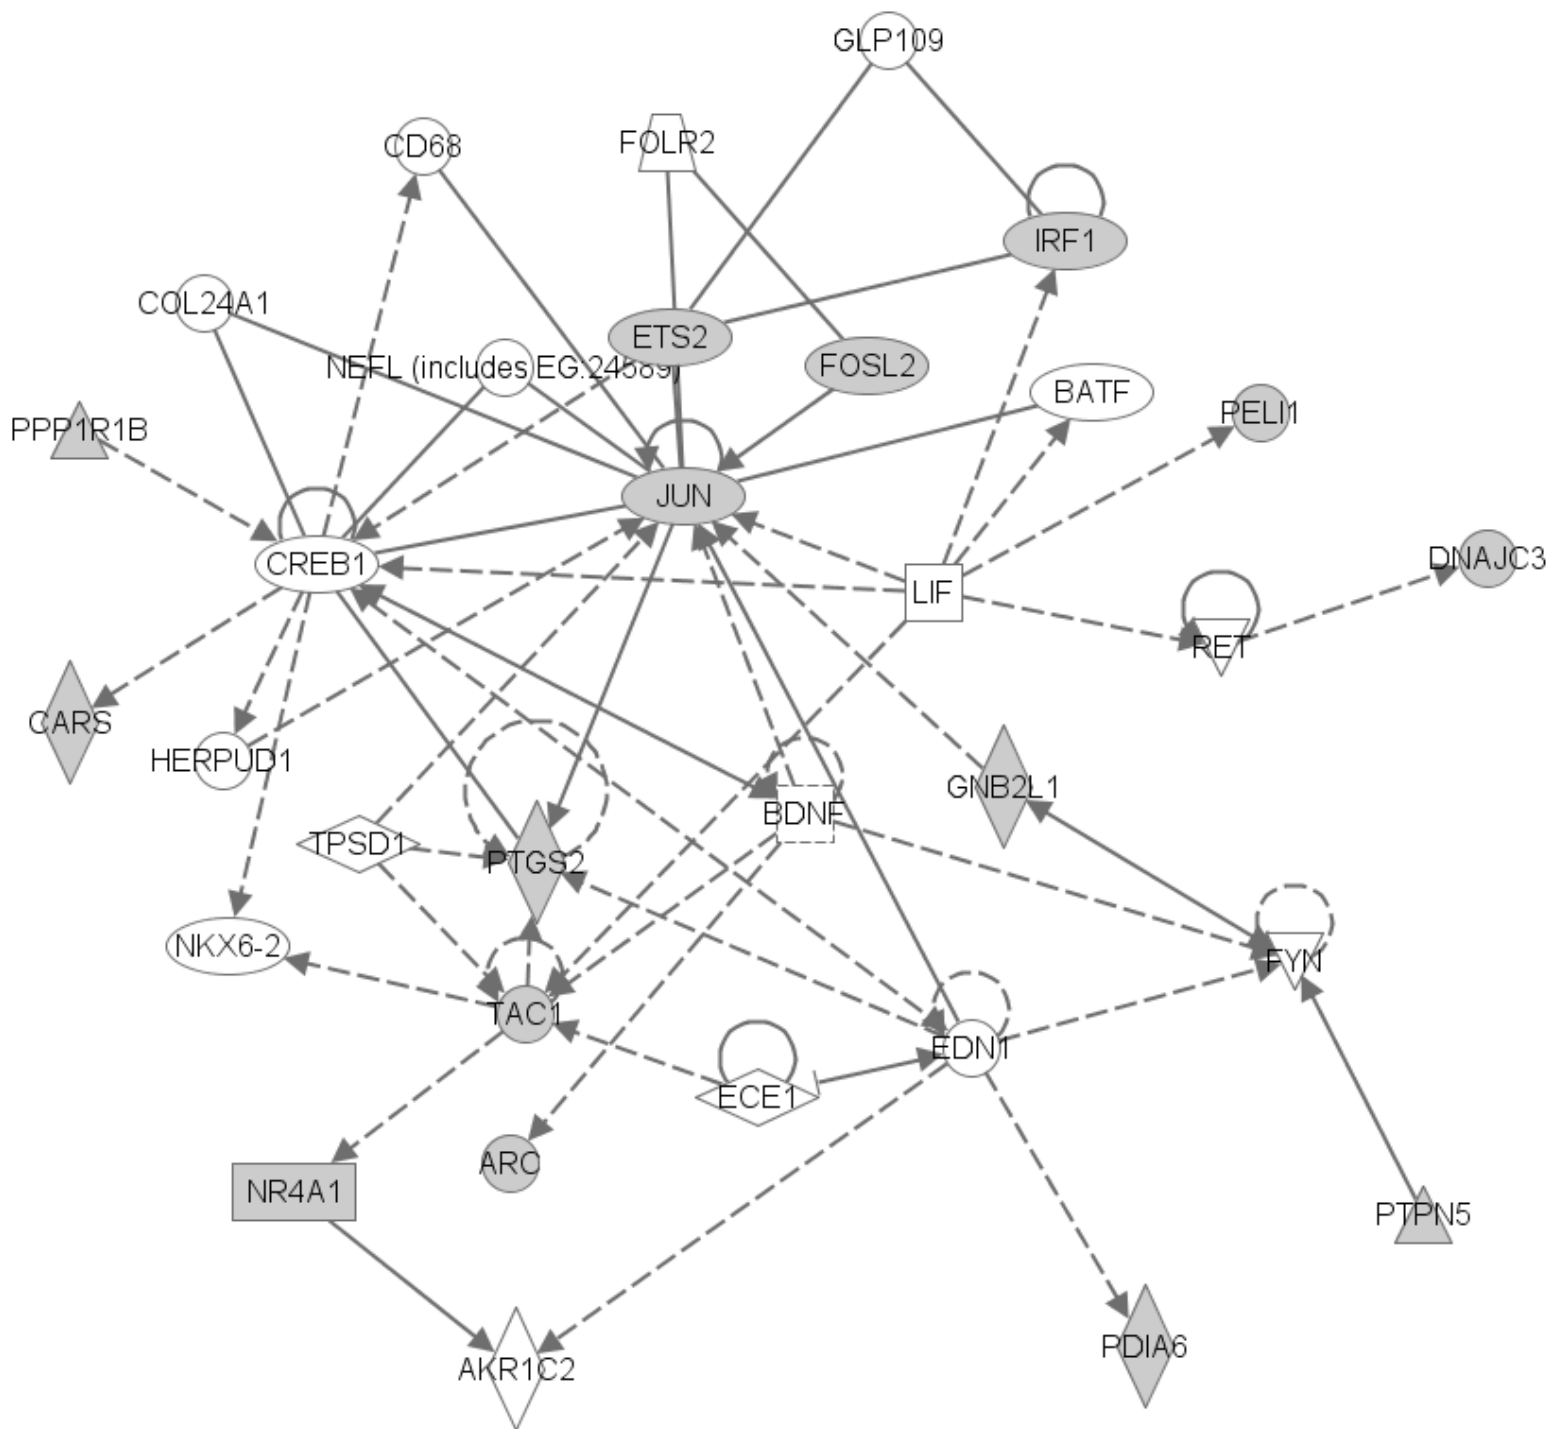

Figure 3b MCAO 24hr

Supplementary Fig. 3b

MCAO 24hr

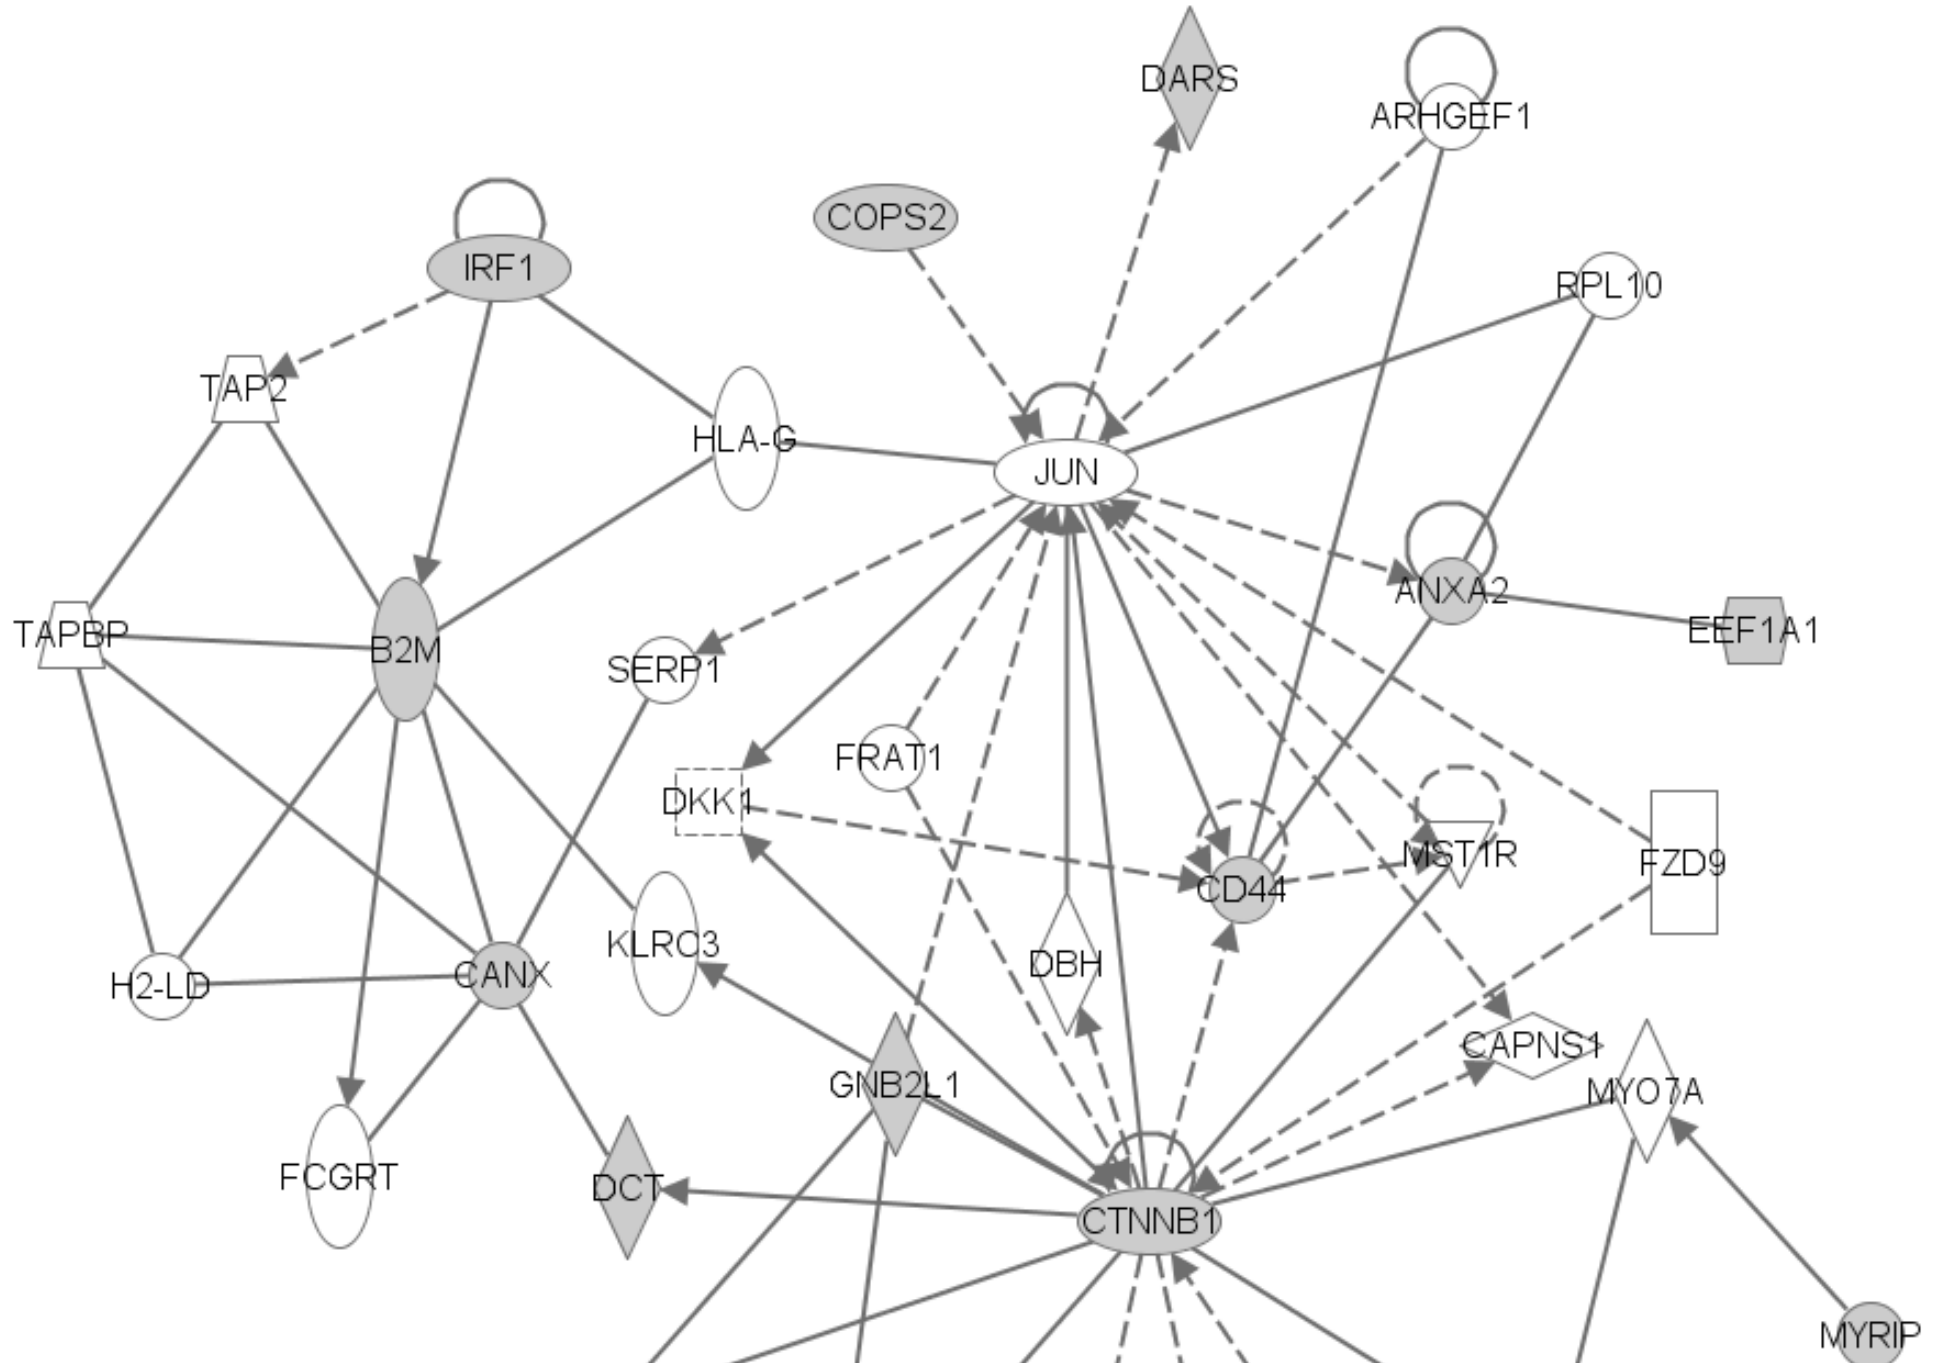



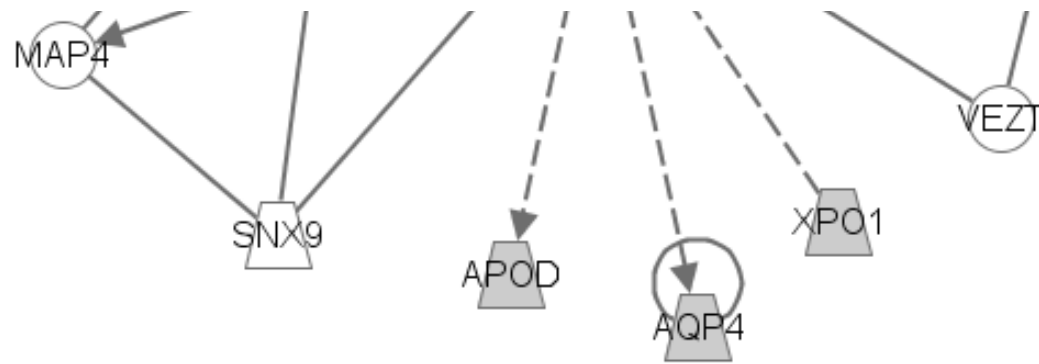

© 2000-2007 Ingenuity Systems, Inc. All rights reserved.

Figure 4a Composite

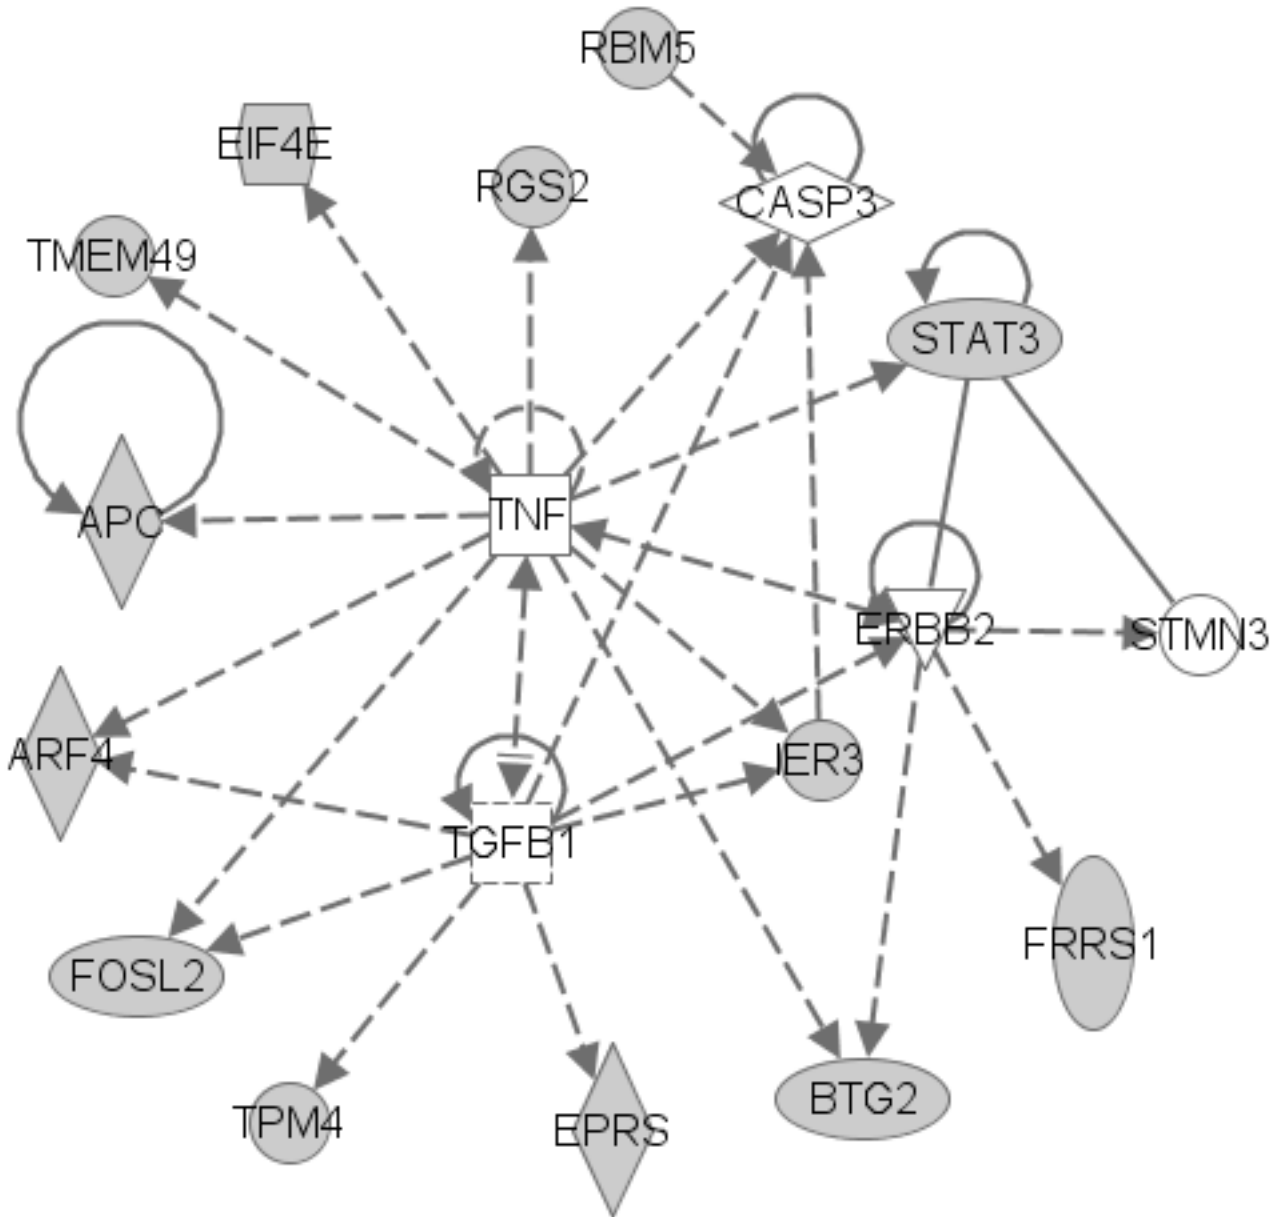

© 2000-2007 Ingenuity Systems, Inc. All rights reserved.
